# Supplementary material for: Exploring and Identifying Prognostic Phenotypes of Patients with Heart Failure Guided by Explainable Machine Learning
Source: MDPI journal article supplement (doi:10.3390/life12060776), 2022-05-24
Supplement: s1 [file s1]

**Table S1. Characteristics of patients with heart failure in derivation dataset**

| Variables                                                            | Total<br>(n=562) | All-cause mortality<br>(n = 81) | Survive<br>(n = 481) | P value |
|----------------------------------------------------------------------|------------------|---------------------------------|----------------------|---------|
| Follow Up (month)                                                    | 30.9±13.7        | 9.9±10.3                        | 34.4±10.8            | <0.001  |
| Cardiovascular mortality                                             | 39 (6.9)         | 39 (48.15)                      | 0 (0)                | NA      |
| Age (years)                                                          | 77.8±13.3        | 82.8±9.0                        | 77.0±13.7            | <0.001  |
| Female                                                               | 257 (45.7)       | 33 (40.7)                       | 224 (46.6)           | 0.393   |
| Length of stay (day)                                                 | 19.3±15.7        | 19.3±13.2                       | 19.3±16.1            | 0.467   |
| Prior admission times                                                | 2.4±2.1          | 2.9±2.3                         | 2.3±2.1              | 0.002   |
| Weight (kg)                                                          | 54.4±14.8        | 51.7±12.3                       | 54.9±15.2            | 0.041   |
| Body mass index (kg/m <sup>2</sup> )                                 | 21.7±4.4         | 21.0±4.0                        | 21.8±4.4             | 0.190   |
| Hypertension                                                         | 363 (64.6)       | 56 (69.1)                       | 307 (63.8)           | 0.424   |
| Hyperlipemia                                                         | 252 (44.8)       | 42 (51.9)                       | 210 (43.7)           | 0.211   |
| Diabetes mellitus                                                    | 190 (33.8)       | 27 (33.3)                       | 163 (33.9)           | 0.977   |
| Chronotropic incompetence                                            | 88 (15.7)        | 14 (17.3)                       | 74 (15.4)            | 0.787   |
| Ischemic heart disease                                               | 179 (31.9)       | 34 (42.0)                       | 145 (30.2)           | 0.047   |
| Peripheral arterial disease                                          | 50 (8.9)         | 10 (12.4)                       | 40 (8.3)             | 0.333   |
| Atrial fibrillation                                                  | 303 (53.9)       | 43 (53.1)                       | 260 (54.1)           | 0.967   |
| Vascular disease                                                     | 194 (34.5)       | 34 (42.0)                       | 160 (33.3)           | 0.162   |
| New York Heart Association (NYHA) at admission                       |                  |                                 |                      | 0.469   |
| 1                                                                    | 24 (4.3)         | 4 (4.9)                         | 20 (4.2)             |         |
| 2                                                                    | 147 (26.2)       | 20 (24.7)                       | 127 (26.4)           |         |
| 3                                                                    | 281 (50.0)       | 37 (45.7)                       | 244 (50.7)           |         |
| 4                                                                    | 110 (19.6)       | 20 (24.7)                       | 90 (18.7)            |         |
| NYHA at discharge                                                    |                  |                                 |                      | <0.001  |
| 1                                                                    | 66 (11.7)        | 5 (6.2)                         | 61 (12.7)            |         |
| 2                                                                    | 426 (75.8)       | 48 (59.3)                       | 378 (78.6)           |         |
| 3                                                                    | 54 (9.6)         | 18 (22.2)                       | 36 (7.5)             |         |
| 4                                                                    | 16 (2.9)         | 10 (12.4)                       | 6 (1.3)              |         |
| Frail (frailty class≥3)                                              | 525 (93.4)       | 79 (97.5)                       | 446 (92.7)           | 0.170   |
| CHADS <sub>2</sub>                                                   | 3.0±1.2          | 3.2±1.2                         | 2.9±1.2              | 0.044   |
| CHA <sub>2</sub> DS <sub>2</sub> -VAsC                               | 5.2±1.8          | 5.6±1.7                         | 5.1±1.8              | 0.034   |
| Independence in daily life for the elderly with cognitive impairment |                  |                                 |                      | <0.001  |
| 0                                                                    | 425 (75.6)       | 48 (59.3)                       | 377 (78.4)           |         |
| 1                                                                    | 99 (17.6)        | 23 (28.4)                       | 76 (15.8)            |         |
| 2                                                                    | 31 (5.5)         | 9 (11.1)                        | 22 (4.6)             |         |
| 3                                                                    | 3 (0.5)          | 0 (0)                           | 3 (0.6)              |         |
| 4                                                                    | 4 (0.7)          | 1 (1.2)                         | 3 (0.6)              |         |
| Low ADL at admission                                                 | 72 (12.8)        | 17 (21.0)                       | 55 (11.4)            | 0.028   |
| Low ADL at discharge                                                 | 31 (5.5)         | 14 (17.3)                       | 17 (3.5)             | <0.001  |
| Left ventricular (LV) ejection fraction (%)                          | 47.2±18.8        | 46.5±19.0                       | 47.4±18.8            | 0.700   |
| HFrEF                                                                | 197 (35.0)       | 29 (35.8)                       | 168 (34.9)           |         |

|                                                       |            |            |            |        |
|-------------------------------------------------------|------------|------------|------------|--------|
| HFmrEF                                                | 114 (20.3) | 18 (22.2)  | 96 (20.0)  |        |
| HFpEF                                                 | 251 (44.7) | 34 (42.0)  | 217 (45.1) |        |
| LV end-diastolic volume (mL)                          | 124.8±58.7 | 131.4±73.7 | 123.7±55.9 | 0.845  |
| LV end-diastolic dimension (mm)                       | 49.7±10.2  | 50.5±12.2  | 49.6±9.8   | 0.506  |
| LV end-systolic diameter (mm)                         | 38.1±12.3  | 39.2±14.3  | 37.9±12.0  | 0.678  |
| Left atrial diameter (mm)                             | 45.0±8.4   | 46.0±8.8   | 44.9±8.3   | 0.303  |
| Mitral regurgitation                                  | 1.5±1.1    | 1.8±1.1    | 1.5±1.1    | 0.030  |
| Tricuspid regurgitation                               | 1.3±1.1    | 1.6±1.2    | 1.3±1.0    | 0.034  |
| RVSP (mmHg)                                           | 29.2±10.3  | 31.0±11.1  | 28.9±10.2  | 0.053  |
| Atrial septal defect after ablation                   | 30 (5.3)   | 4 (4.9)    | 26 (5.4)   | 0.925  |
| Aortic valve replacement                              | 27 (4.8)   | 5 (6.2)    | 22 (4.6)   | 0.733  |
| Hemodialysis                                          | 21 (3.7)   | 5 (6.2)    | 16 (3.3)   | 0.351  |
| ACEi/ARB                                              | 268 (47.7) | 51 (63.0)  | 217 (45.1) | 0.004  |
| Beta blockers                                         | 286 (50.9) | 48 (59.3)  | 238 (49.5) | 0.131  |
| Mineralocorticoid receptor antagonist                 | 149 (26.5) | 28 (34.6)  | 121 (25.2) | 0.101  |
| Diuretic                                              | 302 (53.7) | 49 (60.5)  | 253 (52.6) | 0.231  |
| DOACWFuse at admission                                | 208 (37.0) | 34 (42.0)  | 174 (36.2) | 0.381  |
| DOACWFuse at discharge                                | 272 (48.4) | 34 (42.0)  | 238 (49.5) | 0.919  |
| eGFR at admission (mL/min/1.73m <sup>2</sup> )        | 42.8±21.1  | 34.7±21.4  | 44.2±20.8  | <0.001 |
| eGFR at discharge (mL/min/1.73m <sup>2</sup> )        | 40.8±21.2  | 29.2±18.9  | 42.7±21.0  | <0.001 |
| Creatinine clearance rate (Ccr) at admission (mL/min) | 40.3±26.9  | 28.0±17.6  | 42.4±27.6  | <0.001 |
| Ccr at discharge (mL/min)                             | 37.9±24.8  | 24.6±16.4  | 40.1±25.3  | <0.001 |
| Creatinine (Cr) at admission (mg/dL)                  | 1.5±1.3    | 1.9±1.5    | 1.4±1.2    | <0.001 |
| Cr at discharge (mg/dL)                               | 1.6±1.5    | 2.5±2.5    | 1.4±1.2    | <0.001 |
| Albumin (g/dL)                                        | 3.4±0.5    | 3.3±0.5    | 3.4±0.5    | 0.007  |
| Total protein (g/dL)                                  | 7.0±0.6    | 7.0±0.6    | 7.0±0.6    | 0.592  |
| C-reactive protein (mg/dL)                            | 2.3±4.1    | 2.6±3.6    | 2.3±4.2    | 0.041  |
| Hemoglobin (g/dL)                                     | 11.9±2.4   | 11.3±2.1   | 12.0±2.4   | 0.008  |
| Systolic blood pressure (SBP) at admission (mmHg)     | 132.1±25.9 | 128.2±31.9 | 132.7±24.7 | 0.224  |
| SBP at discharge (mmHg)                               | 112.2±18.1 | 104.9±24.7 | 113.4±16.4 | 0.003  |
| Diastolic blood pressure (DBP) at admission (mmHg)    | 72.8±32.2  | 76.9±73.4  | 72.1±17.7  | 0.272  |
| DBP at discharge (mmHg)                               | 59.3±10.3  | 55.9±12.8  | 59.9±9.7   | 0.008  |
| Heart rate at admission (bpm)                         | 85.3±23.1  | 83.5±19.4  | 85.6±23.7  | 0.394  |

| Heart rate at discharge (bpm)                                                                                                                                                                                                                                                                                                                                                                                                                                                                                                                                                                                                                                                                                                                                                                                                                                                                                                                                                     | 70.2±13.9 | 73.2±18.6 | 69.7±12.9 | 0.104 |
|-----------------------------------------------------------------------------------------------------------------------------------------------------------------------------------------------------------------------------------------------------------------------------------------------------------------------------------------------------------------------------------------------------------------------------------------------------------------------------------------------------------------------------------------------------------------------------------------------------------------------------------------------------------------------------------------------------------------------------------------------------------------------------------------------------------------------------------------------------------------------------------------------------------------------------------------------------------------------------------|-----------|-----------|-----------|-------|
| ACEi (Angiotensin-converting enzyme inhibitor); ADL (activities of daily living); ARB (Angiotensin receptor blocker); CHADS <sub>2</sub> (congestive heart failure: 1 point; hypertension: 1 point, age ≥ 75 years: 1 point; diabetes mellitus: 1 point; prior stroke or TIA or thromboembolism: 2 points); CHAD <sub>2</sub> DS <sub>2</sub> -VAS <sub>C</sub> score (congestive heart failure: 1 point, hypertension: 1 point; age ≥ 75 years: 2 points; diabetes mellitus: 1 point; prior stroke or TIA or thromboembolism: 2 points; vascular disease: 1 point; age 65-74 years: 1 point; sex category: 1 point); DOACWFuse (Direct oral anticoagulants or Warfarin usage); eGFR (estimated glomerular filtration rate); HFmrEF (heart failure with mid-range ejection fraction); HFpEF (heart failure with preserved ejection fraction); HFrEF (heart failure with reduced ejection fraction); NYHA (New York Heart Association); RVSP (Right ventricular systolic pressure) |           |           |           |       |

**Table S2. Comparison between patients in derivation and validation datasets**

| Variables                                                            | Derivation<br>(n=562) | Validation<br>(n=168) | P value |
|----------------------------------------------------------------------|-----------------------|-----------------------|---------|
| Follow Up (month)                                                    | 30.9±13.7             | 13.6±10.2             | <0.001  |
| All-cause mortality                                                  | 81 (14.4)             | 28 (16.7)             | 0.551   |
| Cardiovascular mortality                                             | 39 (6.9)              | 17 (10.1)             | 0.233   |
| Age (years)                                                          | 77.8±13.3             | 78.0±12.8             | 0.927   |
| Female                                                               | 257 (45.7)            | 74 (44.1)             | 0.767   |
| Length of stay (day)                                                 | 19.3±15.7             | 18.5±13.3             | 0.836   |
| Weight (kg)                                                          | 54.4±14.8             | 52.8±12.0             | 0.142   |
| Body mass index (kg/m <sup>2</sup> )                                 | 21.7±4.4              | 20.8±3.7              | 0.017   |
| Hypertension                                                         | 363 (64.6)            | 107 (63.7)            | 0.903   |
| Hyperlipemia                                                         | 252 (44.8)            | 73 (43.5)             | 0.819   |
| Diabetes mellitus                                                    | 190 (33.8)            | 53 (31.6)             | 0.651   |
| Chronotropic incompetence                                            | 88 (15.7)             | 32 (19.1)             | 0.357   |
| Ischemic heart disease                                               | 179 (31.9)            | 64 (38.1)             | 0.157   |
| Peripheral arterial disease                                          | 50 (8.9)              | 22 (13.1)             | 0.146   |
| Atrial fibrillation                                                  | 303 (53.9)            | 94 (56.0)             | 0.706   |
| Vascular disease                                                     | 194 (34.5)            | 74 (44.1)             | 0.031   |
| New York Heart Association (NYHA) at admission                       |                       |                       | 0.080   |
| 1                                                                    | 24 (4.3)              | 17 (10.1)             |         |
| 2                                                                    | 147 (26.2)            | 42 (25.0)             |         |
| 3                                                                    | 281 (50.0)            | 83 (49.4)             |         |
| 4                                                                    | 110 (19.6)            | 26 (15.5)             |         |
| NYHA at discharge                                                    |                       |                       | 0.005   |
| 1                                                                    | 66 (11.7)             | 38 (22.6)             |         |
| 2                                                                    | 426 (75.8)            | 112 (66.7)            |         |
| 3                                                                    | 54 (9.6)              | 12 (7.1)              |         |
| 4                                                                    | 16 (2.9)              | 6 (3.6)               |         |
| Frail (frailty class≥3)                                              | 525 (93.4)            | 151 (89.9)            | 0.171   |
| CHADS <sub>2</sub>                                                   | 3.0±1.2               | 3.0±1.2               | 0.800   |
| CHA <sub>2</sub> DS <sub>2</sub> -VAsC                               | 5.2±1.8               | 4.7±1.6               | 0.002   |
| Independence in daily life for the elderly with cognitive impairment |                       |                       | 0.627   |
| 0                                                                    | 425 (75.6)            | 134 (79.8)            |         |
| 1                                                                    | 99 (17.6)             | 11 (6.6)              |         |
| 2                                                                    | 31 (5.5)              | 10 (6.0)              |         |
| 3                                                                    | 3 (0.5)               | 7 (4.2)               |         |
| 4                                                                    | 4 (0.7)               | 6 (3.6)               |         |
| Low activities of daily life (ADL) at admission                      | 72 (12.8)             | 18 (10.7)             | 0.554   |
| Low ADL at discharge                                                 | 31 (5.5)              | 8 (4.8)               | 0.853   |
| Left ventricular (LV) ejection fraction (%)                          | 47.2±18.8             | 45.1±18.6             | 0.192   |
| HFrEF                                                                | 197 (35.0)            | 67 (39.9)             |         |
| HFmrEF                                                               | 114 (20.3)            | 30 (17.8)             |         |

|                                                                                            |                   |                   |                  |
|--------------------------------------------------------------------------------------------|-------------------|-------------------|------------------|
| <b>HFpEF</b>                                                                               | <b>251 (44.7)</b> | <b>71 (42.3)</b>  |                  |
| <b>LV end-diastolic volume (mL)</b>                                                        | <b>124.8±58.7</b> | <b>121.0±50.3</b> | <b>0.715</b>     |
| <b>LV end-diastolic dimension (mm)</b>                                                     | <b>49.7±10.2</b>  | <b>49.1±9.0</b>   | <b>0.433</b>     |
| <b>LV end-systolic diameter (mm)</b>                                                       | <b>38.1±12.3</b>  | <b>38.1±11.2</b>  | <b>0.777</b>     |
| <b>Left atrial diameter (mm)</b>                                                           | <b>45.0±8.4</b>   | <b>44.3±8.6</b>   | <b>0.356</b>     |
| <b>Mitral regurgitation</b>                                                                | <b>1.5±1.1</b>    | <b>1.7±1.0</b>    | <b>0.014</b>     |
| <b>Tricuspid regurgitation</b>                                                             | <b>1.3±1.1</b>    | <b>1.3±1.0</b>    | <b>0.365</b>     |
| <b>Right ventricular systolic pressure (mmHg)</b>                                          | <b>29.2±10.3</b>  | <b>27.3±10.2</b>  | <b>0.034</b>     |
| <b>Atrial septal defect after ablation</b>                                                 | <b>30 (5.3)</b>   | <b>13 (7.7)</b>   | <b>0.331</b>     |
| <b>Aortic valve replacement</b>                                                            | <b>27 (4.8)</b>   | <b>10 (6.0)</b>   | <b>0.693</b>     |
| <b>Hemodialysis</b>                                                                        | <b>21 (3.7)</b>   | <b>5 (3.0)</b>    | <b>0.819</b>     |
| <b>Angiotensin-converting enzyme inhibitor/Angiotensin receptor blocker</b>                | <b>268 (47.7)</b> | <b>64 (38.1)</b>  | <b>0.036</b>     |
| <b>Beta blockers</b>                                                                       | <b>286 (50.9)</b> | <b>85 (50.6)</b>  | <b>1</b>         |
| <b>Mineralocorticoid receptor antagonist</b>                                               | <b>149 (26.5)</b> | <b>37 (22.0)</b>  | <b>0.284</b>     |
| <b>Diuretic</b>                                                                            | <b>302 (53.7)</b> | <b>73 (43.5)</b>  | <b>0.024</b>     |
| <b>Direct oral anticoagulants/Warfarin usage at admission</b>                              | <b>208 (37.0)</b> | <b>73 (43.5)</b>  | <b>0.157</b>     |
| <b>Direct oral anticoagulants/Warfarin usage at discharge</b>                              | <b>272 (48.4)</b> | <b>90 (53.6)</b>  | <b>0.276</b>     |
| <b>Estimated glomerular filtration rate (eGFR) at admission (mL/min/1.73m<sup>2</sup>)</b> | <b>42.8±21.1</b>  | <b>44.1±19.6</b>  | <b>0.458</b>     |
| <b>eGFR at discharge (mL/min/1.73m<sup>2</sup>)</b>                                        | <b>40.8±21.2</b>  | <b>47.4±61.3</b>  | <b>0.197</b>     |
| <b>Creatinine clearance rate (Ccr) at admission (mL/min)</b>                               | <b>40.3±26.9</b>  | <b>36.6±20.2</b>  | <b>0.382</b>     |
| <b>Ccr at discharge (mL/min)</b>                                                           | <b>37.9±24.8</b>  | <b>38.1±34.8</b>  | <b>0.669</b>     |
| <b>Creatinine (Cr) at admission (mg/dL)</b>                                                | <b>1.5±1.3</b>    | <b>1.4±1.0</b>    | <b>0.257</b>     |
| <b>Cr at discharge (mg/dL)</b>                                                             | <b>1.6±1.5</b>    | <b>1.5±1.3</b>    | <b>0.063</b>     |
| <b>Albumin (g/dL)</b>                                                                      | <b>3.4±0.5</b>    | <b>3.4±0.5</b>    | <b>0.491</b>     |
| <b>Total protein (g/dL)</b>                                                                | <b>7.0±0.6</b>    | <b>6.9±0.7</b>    | <b>0.094</b>     |
| <b>C-reactive protein (mg/dL)</b>                                                          | <b>2.3±4.1</b>    | <b>2.1±4.2</b>    | <b>0.121</b>     |
| <b>Hemoglobin (g/dL)</b>                                                                   | <b>11.9±2.4</b>   | <b>12.1±2.3</b>   | <b>0.316</b>     |
| <b>Systolic blood pressure (SBP) at admission (mmHg)</b>                                   | <b>132.1±25.9</b> | <b>139.0±32.8</b> | <b>0.066</b>     |
| <b>SBP at discharge (mmHg)</b>                                                             | <b>112.2±18.1</b> | <b>119.8±81.0</b> | <b>0.422</b>     |
| <b>Diastolic blood pressure (DBP) at admission (mmHg)</b>                                  | <b>72.8±32.2</b>  | <b>80.6±24.1</b>  | <b>&lt;0.001</b> |
| <b>DBP at discharge (mmHg)</b>                                                             | <b>59.3±10.3</b>  | <b>61.5±10.4</b>  | <b>0.017</b>     |
| <b>Heart rate at admission (bpm)</b>                                                       | <b>85.3±23.1</b>  | <b>91.7±27.3</b>  | <b>0.006</b>     |
| <b>Heart rate at discharge (bpm)</b>                                                       | <b>70.2±13.9</b>  | <b>70.9±14.6</b>  | <b>0.592</b>     |

## The optimal number of clusters

The patients in derivation dataset seemed to be divided into two clusters (one in green, the other in red) based on dendrogram shown in **Figure S1(a)**, or each of which could be further divided into two groups, to obtain four clusters. However, it was unreliable to determine the optimal number of clusters, i.e., “k” by visually inspecting the dendrogram alone. Viewing in the scree plot shown in **Figure S1(b)**, there was a turning point where distance equals 12.7 approximately. Before this turning point, the distance reduced greatly for each increment in the number of clusters. After this point, while the number of clusters increased the distance reduced asymptotically, suggesting “k” should correspond to this turning point. In this case, a horizontal line (black dotted line) passing over the dendrogram in **Figure S1(a)** at a distance equaling 12.7 divided the clusters at 5 points, or 6 or even 7 points. This imprecision arose because there were two red groups that just touched the horizontal line. Therefore, the distortion score and Calinski–Harabasz score were used for further confirmation. As shown in **Figure S1(c, d)**, both scores determined that the optimal number of clusters was 5 ( $k = 5$ ).

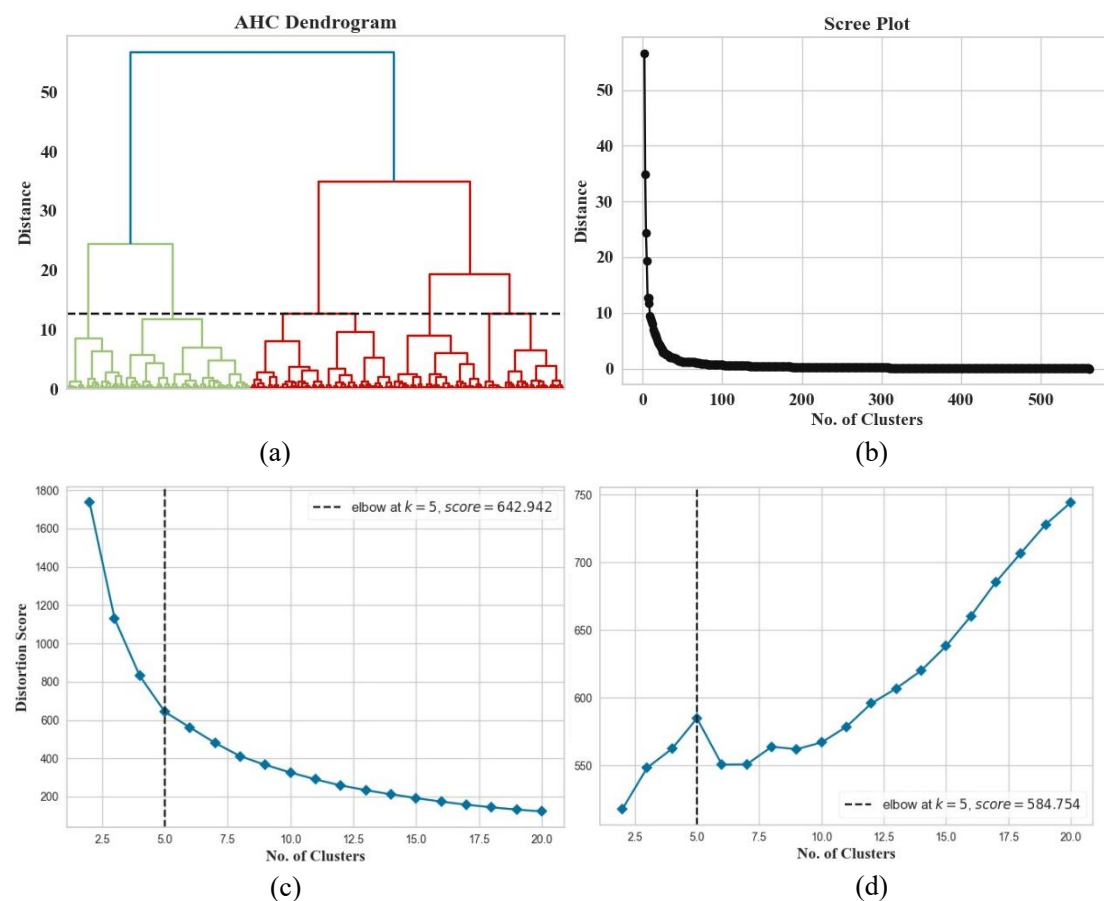

**Figure S1.** Optimal number of clusters ( $k = 5$ ) determined by dendrogram (a), scree plot (b) and elbow method based on distortion score (c) and calinski harabasz score (d).

**Table S3 Validation of stability and robustness of clustering**

|                                 | Cluster1          | Cluster2          | Cluster3         | Cluster4         | Cluster5          | Total      |
|---------------------------------|-------------------|-------------------|------------------|------------------|-------------------|------------|
| <b>Number of patients</b>       | <b>160 (28.5)</b> | <b>142 (25.3)</b> | <b>91 (16.2)</b> | <b>66 (11.7)</b> | <b>103 (18.3)</b> | <b>562</b> |
| <b>Validation of stability</b>  |                   |                   |                  |                  |                   |            |
| <b>Subgroup1</b>                | <b>29 (25.7)</b>  | <b>25 (22.1)</b>  | <b>20 (17.7)</b> | <b>17 (15.0)</b> | <b>22 (19.5)</b>  | <b>113</b> |
| <b>P value</b>                  | <b>0.623</b>      | <b>0.557</b>      | <b>0.799</b>     | <b>0.413</b>     | <b>0.879</b>      |            |
| <b>Subgroup2</b>                | <b>30 (26.5)</b>  | <b>29 (25.7)</b>  | <b>22 (19.5)</b> | <b>8 (7.1)</b>   | <b>24 (21.2)</b>  | <b>113</b> |
| <b>P value</b>                  | <b>0.764</b>      | <b>1</b>          | <b>0.476</b>     | <b>0.200</b>     | <b>0.555</b>      |            |
| <b>Subgroup3</b>                | <b>37 (32.7)</b>  | <b>27 (23.9)</b>  | <b>18 (15.9)</b> | <b>8 (7.1)</b>   | <b>22 (19.5)</b>  | <b>112</b> |
| <b>P value</b>                  | <b>0.392</b>      | <b>0.889</b>      | <b>1</b>         | <b>0.209</b>     | <b>0.846</b>      |            |
| <b>Subgroup4</b>                | <b>35 (31.0)</b>  | <b>28 (24.8)</b>  | <b>15 (13.3)</b> | <b>13 (11.5)</b> | <b>21 (18.6)</b>  | <b>112</b> |
| <b>P value</b>                  | <b>0.632</b>      | <b>1</b>          | <b>0.548</b>     | <b>1</b>         | <b>1</b>          |            |
| <b>Subgroup5</b>                | <b>28 (24.8)</b>  | <b>23 (20.4)</b>  | <b>21 (18.6)</b> | <b>17 (15.0)</b> | <b>23 (20.4)</b>  | <b>112</b> |
| <b>P value</b>                  | <b>0.527</b>      | <b>0.346</b>      | <b>0.600</b>     | <b>0.394</b>     | <b>0.678</b>      |            |
| <b>Validation of robustness</b> |                   |                   |                  |                  |                   |            |
| <b>K-means</b>                  | <b>153 (27.2)</b> | <b>138 (24.6)</b> | <b>98 (17.4)</b> | <b>68 (12.1)</b> | <b>23 (20.4)</b>  | <b>562</b> |
| <b>P value</b>                  | <b>0.690</b>      | <b>0.836</b>      | <b>0.632</b>     | <b>0.927</b>     | <b>0.678</b>      |            |

**Table S4 Characteristics of clusters**

| Variables                                                | Cluster1<br>(n = 160) | cluster2<br>(n = 142) | Cluster3<br>(n = 91) | Cluster4<br>(n = 66) | Cluster5<br>(n = 103) |
|----------------------------------------------------------|-----------------------|-----------------------|----------------------|----------------------|-----------------------|
| All-cause mortality                                      | 23 (14.4)             | 6 (4.2)               | 25 (27.5)            | 10 (15.2)            | 17 (16.5)             |
| Follow Up (month)                                        | 30.9±13.9             | 32.9±11.0             | 25.8±16.2            | 32.2±13.9            | 31.6±13.6             |
| Cardiovascular mortality                                 | 10 (6.3)              | 2 (1.4)               | 15 (16.5)            | 5 (7.6)              | 7 (6.8)               |
| Age (years)                                              | 83.4±7.6              | 64.0±14.5             | 84.7±10.0            | 76.8±9.4             | 82.5±7.7              |
| Female                                                   | 110 (68.8)            | 34 (23.9)             | 43 (47.3)            | 27 (40.9)            | 43 (41.8)             |
| Length of stay                                           | 21.6±18.8             | 15.0±9.6              | 24.0±20.1            | 17.3±12.7            | 18.3±12.6             |
| Admission times                                          | 2.1±1.7               | 1.5±1.0               | 2.3±2.1              | 3.7±3.0              | 3.2±2.6               |
| Weight (kg)                                              | 46.5±10.5             | 66.6±15.0             | 49.8±12.9            | 55.6±15.2            | 53.4±10.2             |
| BMI (kg/m <sup>2</sup> )                                 | 20.0±3.8              | 24.3±4.6              | 20.4±4.0             | 21.9±4.3             | 21.7±3.7              |
| Hypertension                                             | 98 (61.3)             | 84 (59.2)             | 62 (68.1)            | 35 (53.0)            | 84 (81.6)             |
| Hyperlipemia                                             | 40 (25.0)             | 54 (38.0)             | 39 (42.9)            | 40 (60.6)            | 79 (76.7)             |
| Diabetes mellitus                                        | 32 (20.0)             | 40 (28.2)             | 33 (36.3)            | 23 (34.9)            | 62 (60.2)             |
| Chronotropic incompetence                                | 31 (19.4)             | 3 (2.1)               | 22 (24.2)            | 7 (10.6)             | 25 (24.3)             |
| Ischemic heart disease                                   | 8 (5.0)               | 17 (12.0)             | 36 (39.6)            | 39 (59.1)            | 79 (76.7)             |
| Peripheral arterial disease                              | 3 (1.9)               | 0 (0)                 | 13 (14.3)            | 0 (0)                | 34 (33.0)             |
| Atrial fibrillation                                      | 109 (68.1)            | 69 (48.6)             | 40 (44.0)            | 50 (75.8)            | 35 (34.0)             |
| Vascular disease                                         | 11 (6.9)              | 19 (13.4)             | 41 (45.1)            | 39 (59.1)            | 84 (81.6)             |
| New York Heart Association (NYHA) at admission           |                       |                       |                      |                      |                       |
| 1                                                        | 7 (4.4)               | 9 (6.3)               | 5 (5.5)              | 2 (3.0)              | 1 (1.0)               |
| 2                                                        | 48 (30.0)             | 37 (26.1)             | 11 (12.1)            | 22 (33.3)            | 29 (28.2)             |
| 3                                                        | 83 (51.9)             | 77 (54.2)             | 39 (42.9)            | 32 (48.5)            | 50 (48.5)             |
| 4                                                        | 22 (13.8)             | 19 (13.4)             | 36 (39.6)            | 10 (15.2)            | 23 (22.3)             |
| NYHA at discharge                                        |                       |                       |                      |                      |                       |
| 1                                                        | 9 (5.6)               | 41 (28.9)             | 8 (8.8)              | 5 (7.6)              | 3 (2.9)               |
| 2                                                        | 129 (80.6)            | 99 (69.7)             | 55 (60.4)            | 55 (83.3)            | 88 (85.4)             |
| 3                                                        | 19 (11.9)             | 0 (0)                 | 19 (20.9)            | 5 (7.6)              | 11 (10.7)             |
| 4                                                        | 3 (1.9)               | 2 (1.4)               | 9 (9.9)              | 1 (1.5)              | 1 (1.0)               |
| Frail (frailty≥3)                                        | 158 (98.8)            | 107 (75.4)            | 91 (100)             | 66 (100)             | 103 (100)             |
| CHADS <sub>2</sub>                                       | 3.1±1.2               | 2.2±0.9               | 3.3±1.2              | 2.7±0.9              | 3.8±1.0               |
| CHAD <sub>2</sub> DS <sub>2</sub> -VASc                  | 5.4±1.6               | 3.5±1.4               | 5.8±1.4              | 5.1±1.3              | 6.6±1.4               |
| Independence in daily life for the elderly with dementia |                       |                       |                      |                      |                       |
| 0                                                        | 113 (70.6)            | 136 (95.8)            | 41 (45.1)            | 53 (80.3)            | 82 (79.6)             |
| 1                                                        | 37 (23.1)             | 6 (4.2)               | 27 (29.7)            | 12 (18.2)            | 17 (16.5)             |
| 2                                                        | 6 (3.8)               | 0 (0)                 | 20 (22.0)            | 1 (1.5)              | 4 (3.9)               |
| 3                                                        | 2 (1.3)               | 0 (0)                 | 1 (1.1)              | 0 (0)                | 0 (0)                 |
| 4                                                        | 2 (1.3)               | 0 (0)                 | 4 (2.2)              | 0 (0)                | 0 (0)                 |
| Low activities of daily life (ADL) at admission          | 6 (3.8)               | 5 (3.5)               | 53 (58.2)            | 2 (3.0)              | 6 (5.8)               |
| Low ADL at discharge                                     | 3 (1.9)               | 2 (1.4)               | 25 (27.5)            | 0 (0)                | 1 (1.0)               |
| Left ventricular (LV) ejection                           | 57.6±16.1             | 37.7±18.0             | 47.2±16.1            | 42.3±18.9            | 47.4±17.9             |

|                                                                                            |                   |                   |                   |                   |                   |
|--------------------------------------------------------------------------------------------|-------------------|-------------------|-------------------|-------------------|-------------------|
| <b>fraction (EF) (%)</b>                                                                   |                   |                   |                   |                   |                   |
| <b>LV end-diastolic volume (mL)</b>                                                        | <b>93.3±40.7</b>  | <b>161.9±69.7</b> | <b>115.5±45.3</b> | <b>147.3±58.9</b> | <b>116.6±41.3</b> |
| <b>LV end-diastolic diameter (mm)</b>                                                      | <b>43.8±8.2</b>   | <b>56.3±10.6</b>  | <b>47.7±8.5</b>   | <b>53.8±9.6</b>   | <b>48.8±7.8</b>   |
| <b>LV end-systolic diameter (mm)</b>                                                       | <b>30.5±9.1</b>   | <b>46.2±13.2</b>  | <b>36.4±9.5</b>   | <b>42.8±12.2</b>  | <b>37.1±9.7</b>   |
| <b>Left atrial diameter (mm)</b>                                                           | <b>45.1±10.5</b>  | <b>45.9±7.2</b>   | <b>43.0±7.3</b>   | <b>48.9±8.0</b>   | <b>42.9±6.3</b>   |
| <b>Mitral regurgitation</b>                                                                | <b>1.5±1.1</b>    | <b>1.5±1.0</b>    | <b>1.5±1.0</b>    | <b>1.9±1.2</b>    | <b>1.4±0.9</b>    |
| <b>Tricuspid regurgitation</b>                                                             | <b>1.8±1.2</b>    | <b>1.0±0.8</b>    | <b>1.1±0.8</b>    | <b>1.5±1.1</b>    | <b>1.0±0.8</b>    |
| <b>Right ventricular systolic pressure (mmHg)</b>                                          | <b>30.8±11.6</b>  | <b>25.9±8.8</b>   | <b>28.7±9.0</b>   | <b>31.1±11.3</b>  | <b>30.2±9.8</b>   |
| <b>Atrial septal defect after ablation</b>                                                 | <b>3 (1.9)</b>    | <b>3 (2.1)</b>    | <b>2 (2.2)</b>    | <b>22 (33.3)</b>  | <b>0 (0)</b>      |
| <b>Aortic valve replacement</b>                                                            | <b>17 (10.6)</b>  | <b>2 (1.4)</b>    | <b>3 (3.3)</b>    | <b>0 (0)</b>      | <b>5 (4.9)</b>    |
| <b>Hemodialysis</b>                                                                        | <b>0 (0)</b>      | <b>0 (0)</b>      | <b>21 (23.1)</b>  | <b>0 (0)</b>      | <b>0 (0)</b>      |
| <b>Angiotensin-converting enzyme inhibitor /Angiotensin receptor blocker</b>               | <b>79 (49.4)</b>  | <b>52 (36.6)</b>  | <b>37 (40.7)</b>  | <b>35 (53.0)</b>  | <b>65 (63.1)</b>  |
| <b>Beta blockers</b>                                                                       | <b>80 (50.0)</b>  | <b>54 (38.0)</b>  | <b>34 (37.4)</b>  | <b>47 (71.2)</b>  | <b>71 (68.9)</b>  |
| <b>Mineralocorticoid receptor antagonist</b>                                               | <b>55 (34.4)</b>  | <b>27 (19.0)</b>  | <b>8 (8.8)</b>    | <b>34 (51.5)</b>  | <b>25 (24.3)</b>  |
| <b>Diuretic</b>                                                                            | <b>101 (63.1)</b> | <b>55 (38.7)</b>  | <b>33 (36.3)</b>  | <b>55 (83.3)</b>  | <b>58 (56.3)</b>  |
| <b>Direct oral anticoagulants/Warfarin used at admission</b>                               | <b>84 (52.5)</b>  | <b>39 (27.5)</b>  | <b>19 (20.9)</b>  | <b>51 (77.3)</b>  | <b>15 (14.6)</b>  |
| <b>Direct oral anticoagulants/Warfarin used at discharge</b>                               | <b>100 (62.5)</b> | <b>71 (50.0)</b>  | <b>22 (24.2)</b>  | <b>51 (77.3)</b>  | <b>28 (27.2)</b>  |
| <b>Estimated glomerular filtration rate (eGFR) at admission (mL/min/1.73m<sup>2</sup>)</b> | <b>41.9±19.9</b>  | <b>54.5±17.7</b>  | <b>32.6±27.1</b>  | <b>40.6±15.4</b>  | <b>38.6±17.3</b>  |
| <b>eGFR at discharge (mL/min/1.73m<sup>2</sup>)</b>                                        | <b>41.1±22.1</b>  | <b>50.0±16.4</b>  | <b>32.7±29.0</b>  | <b>37.9±15.7</b>  | <b>36.5±15.7</b>  |
| <b>Creatinine clearance rate (Ccr) at admission (mL/min)</b>                               | <b>31.1±15.0</b>  | <b>69.7±30.8</b>  | <b>19.8±13.1</b>  | <b>39.2±17.6</b>  | <b>32.9±13.8</b>  |
| <b>Ccr at discharge (mL/min)</b>                                                           | <b>30.7±15.4</b>  | <b>63.0±30.3</b>  | <b>20.2±13.3</b>  | <b>35.3±14.2</b>  | <b>31.4±12.8</b>  |
| <b>Creatinine at admission (mg/dL)</b>                                                     | <b>1.2±0.6</b>    | <b>1.1±0.4</b>    | <b>2.7±2.5</b>    | <b>1.3±0.6</b>    | <b>1.4±0.7</b>    |
| <b>Creatinine at discharge (mg/dL)</b>                                                     | <b>1.3±0.6</b>    | <b>1.2±0.5</b>    | <b>3.0±3.1</b>    | <b>1.5±0.7</b>    | <b>1.5±0.7</b>    |
| <b>Albumin (g/dL)</b>                                                                      | <b>3.3±0.5</b>    | <b>3.6±0.4</b>    | <b>3.2±0.5</b>    | <b>3.6±0.4</b>    | <b>3.4±0.5</b>    |
| <b>Total protein (g/dL)</b>                                                                | <b>6.9±0.6</b>    | <b>7.0±0.6</b>    | <b>7.0±0.7</b>    | <b>7.1±0.6</b>    | <b>7.0±0.6</b>    |
| <b>C-reactive protein (mg/dL)</b>                                                          | <b>2.6±4.9</b>    | <b>1.4±2.5</b>    | <b>4.1±5.5</b>    | <b>1.6±2.6</b>    | <b>2.0±3.1</b>    |

|                                                               |                   |                   |                   |                   |                   |
|---------------------------------------------------------------|-------------------|-------------------|-------------------|-------------------|-------------------|
| <b>Hemoglobin (g/dL)</b>                                      | <b>11.1±2.0</b>   | <b>13.6±2.5</b>   | <b>11.0±2.1</b>   | <b>12.1±2.0</b>   | <b>11.4±2.0</b>   |
| <b>Systolic blood pressure (SBP)<br/>at admission (mmHg)</b>  | <b>127.7±24.5</b> | <b>131.4±25.9</b> | <b>137.5±27.1</b> | <b>127.1±23.4</b> | <b>138.1±26.6</b> |
| <b>SBP at discharge (mmHg)</b>                                | <b>110.7±18.3</b> | <b>109.8±16.2</b> | <b>110.0±20.4</b> | <b>109.2±11.8</b> | <b>121.7±18.4</b> |
| <b>Diastolic blood pressure<br/>(DBP) at admission (mmHg)</b> | <b>67.7±14.1</b>  | <b>76.6±20.1</b>  | <b>79.7±69.0</b>  | <b>68.7±14.3</b>  | <b>72.1±20.0</b>  |
| <b>DBP at discharge (mmHg)</b>                                | <b>57.7±11.1</b>  | <b>62.0±9.3</b>   | <b>56.0±11.1</b>  | <b>60.8±8.3</b>   | <b>60.2±9.4</b>   |
| <b>Heart rate at admission (bmp)</b>                          | <b>80.0±21.9</b>  | <b>94.6±26.9</b>  | <b>86.9±21.0</b>  | <b>85.8±19.1</b>  | <b>78.8±18.9</b>  |
| <b>Heart rate at discharge (bmp)</b>                          | <b>73.2±12.9</b>  | <b>69.8±13.1</b>  | <b>69.7±16.8</b>  | <b>71.3±13.8</b>  | <b>65.9±12.5</b>  |

**Table S5 Characteristics of phenotypes**

| Variables                                                | Phenotype 1<br>(n = 91) | Phenotype 2<br>(n = 142) | Phenotype 3<br>(n = 329) | 1 vs. 2 | 1 vs. 3 | 2 vs. 3 |
|----------------------------------------------------------|-------------------------|--------------------------|--------------------------|---------|---------|---------|
| <b>Risk level</b>                                        | <b>High</b>             | <b>Low</b>               | <b>Intermediate</b>      |         |         |         |
| All-cause mortality                                      | 25 (27.5)               | 6 (4.2)                  | 50 (15.2)                | <0.001  | 0.011   | 0.001   |
| Follow Up (month)                                        | 25.8±16.2               | 32.9±11.0                | 31.4±13.8                | 0.003   | 0.005   | 0.591   |
| Cardiovascular mortality                                 | 15 (16.5)               | 2 (1.4)                  | 22 (6.7)                 | <0.001  | 0.007   | 0.031   |
| Age (years)                                              | 84.7±10.0               | 64.0±14.5                | 81.2±8.4                 | <0.001  | 0.002   | <0.001  |
| Female                                                   | 43 (47.3)               | 34 (23.9)                | 180 (54.7)               | <0.001  | 0.253   | <0.001  |
| Length of stay (day)                                     | 24.0±20.1               | 15.0±9.6                 | 19.9±16.1                | <0.001  | 0.103   | 0.005   |
| Prior admission times                                    | 2.3±2.1                 | 1.5±1.0                  | 2.8±2.4                  | <0.001  | 0.023   | <0.001  |
| Weight (kg)                                              | 49.8±12.9               | 66.6±15.0                | 50.5±12.1                | <0.001  | 0.646   | <0.001  |
| BMI (kg/m <sup>2</sup> )                                 | 20.4±4.0                | 24.3±4.6                 | 20.9±3.9                 | <0.001  | 0.339   | <0.001  |
| Hypertension                                             | 62 (68.1)               | 84 (59.2)                | 217 (66.0)               | 0.214   | 0.792   | 0.192   |
| Hyperlipemia                                             | 39 (42.9)               | 54 (38.0)                | 159 (48.3)               | 0.550   | 0.420   | 0.050   |
| Diabetes mellitus                                        | 33 (36.3)               | 40 (28.2)                | 117 (35.6)               | 0.248   | 1       | 0.146   |
| Chronotropic incompetence                                | 22 (24.2)               | 3 (2.1)                  | 63 (19.2)                | <0.001  | 0.363   | <0.001  |
| Ischemic heart disease                                   | 36 (39.6)               | 17 (12.0)                | 126 (38.3)               | <0.001  | 0.923   | <0.001  |
| Peripheral arterial disease                              | 13 (14.3)               | 0 (0)                    | 37 (11.3)                | <0.001  | 0.542   | <0.001  |
| Atrial fibrillation                                      | 40 (44.0)               | 69 (48.6)                | 194 (59.0)               | 0.577   | 0.015   | 0.048   |
| Vascular disease                                         | 41 (45.1)               | 19 (13.4)                | 134 (40.7)               | <0.001  | 0.535   | <0.001  |
| New York Heart Association (NYHA) at admission           |                         |                          |                          | <0.001  | <0.001  | 0.607   |
| 1                                                        | 5 (5.5)                 | 9 (6.3)                  | 10 (3.0)                 |         |         |         |
| 2                                                        | 11 (12.1)               | 37 (26.1)                | 99 (30.1)                |         |         |         |
| 3                                                        | 39 (42.9)               | 77 (54.2)                | 165 (50.2)               |         |         |         |
| 4                                                        | 36 (39.6)               | 19 (13.4)                | 55 (16.7)                |         |         |         |
| NYHA at discharge (NYHA_D)                               |                         |                          |                          | <0.001  | 0.002   | <0.001  |
| 1                                                        | 8 (8.8)                 | 41 (28.9)                | 17 (5.2)                 |         |         |         |
| 2                                                        | 55 (60.4)               | 99 (69.7)                | 272 (82.7)               |         |         |         |
| 3                                                        | 19 (20.9)               | 0 (0)                    | 35 (10.6)                |         |         |         |
| 4                                                        | 9 (9.9)                 | 2 (1.4)                  | 5 (1.5)                  |         |         |         |
| NYHA_D > 2                                               | 28 (30.8)               | 2 (1.4)                  | 40 (12.2)                | <0.001  | <0.001  | <0.001  |
| Frail (frailty class≥3)                                  | 91 (100)                | 107 (75.4)               | 327 (99.4)               | <0.001  | 1       | <0.001  |
| CHADS <sub>2</sub>                                       | 3.3±1.2                 | 2.2±0.9                  | 3.2±1.1                  | <0.001  | 0.529   | <0.001  |
| CHAD <sub>2</sub> DS <sub>2</sub> -VASc                  | 5.8±1.4                 | 3.5±1.4                  | 5.7±1.6                  | <0.001  | 0.529   | <0.001  |
| Independence in daily life for the elderly with dementia |                         |                          |                          | <0.001  | <0.001  | <0.001  |
| 0                                                        | 41 (45.1)               | 136 (95.8)               | 248 (75.4)               |         |         |         |
| 1                                                        | 27 (29.7)               | 6 (4.2)                  | 66 (20.1)                |         |         |         |
| 2                                                        | 20 (22.0)               | 0 (0)                    | 11 (3.3)                 |         |         |         |
| 3                                                        | 1 (1.1)                 | 0 (0)                    | 2 (0.6)                  |         |         |         |
| 4                                                        | 4 (2.2)                 | 0 (0)                    | 2 (0.6)                  |         |         |         |
| IDL > 1                                                  | 25 (27.5)               | 0 (0)                    | 15 (4.6)                 | <0.001  | <0.001  | 0.007   |

|                                                                                       |            |            |            |        |        |        |
|---------------------------------------------------------------------------------------|------------|------------|------------|--------|--------|--------|
| Low activities of daily life (ADL) at admission                                       | 53 (58.2)  | 5 (3.5)    | 14 (4.2)   | <0.001 | <0.001 | 0.907  |
| Low ADL at discharge                                                                  | 25 (27.5)  | 2 (1.4)    | 4 (1.2)    | <0.001 | <0.001 | 1      |
| Left ventricular (LV) ejection fraction (EF) (%)                                      | 47.2±16.1  | 37.7±18.0  | 51.3±18.3  | <0.001 | 0.038  | <0.001 |
| HF with reduced EF                                                                    | 31 (34.1)  | 79 (55.6)  | 87 (26.4)  | 0.002  | 0.194  | <0.001 |
| HF with mid-range EF                                                                  | 23 (25.3)  | 30 (21.1)  | 61 (18.5)  | 0.564  | 0.203  | 0.600  |
| HF with preserved EF                                                                  | 37 (40.7)  | 33 (23.2)  | 181 (55.0) | 0.007  | 0.021  | <0.001 |
| LV end-diastolic volume (mL)                                                          | 115.5±45.3 | 161.9±69.7 | 111.4±49.5 | <0.001 | 0.374  | <0.001 |
| LV end-diastolic diameter (mm)                                                        | 47.7±8.5   | 56.3±10.6  | 47.4±9.2   | <0.001 | 0.751  | <0.001 |
| LV end-systolic diameter (mm)                                                         | 36.4±9.5   | 46.2±13.2  | 35.0±11.0  | <0.001 | 0.137  | <0.001 |
| Left atrial diameter (mm)                                                             | 43.0±7.3   | 45.9±7.2   | 45.2±9.1   | 0.004  | 0.020  | 0.383  |
| Mitral regurgitation                                                                  | 1.5±1.0    | 1.5±1.0    | 1.6±1.1    | 0.715  | 0.798  | 0.447  |
| Tricuspid regurgitation                                                               | 1.1±0.8    | 1.0±0.8    | 1.5±1.1    | 0.384  | 0.001  | <0.001 |
| Right ventricular systolic pressure (mmHg)                                            | 28.7±9.0   | 25.9±8.8   | 30.7±10.9  | 0.012  | 0.250  | <0.001 |
| Atrial septal defect after ablation                                                   | 2 (2.2)    | 3 (2.1)    | 25 (7.6)   | 1      | 0.106  | 0.036  |
| Aortic valve replacement                                                              | 3 (3.3)    | 2 (1.4)    | 22 (6.7)   | 0.384  | 0.337  | 0.031  |
| Hemodialysis                                                                          | 21 (23.1)  | 0 (0)      | 0 (0)      | <0.001 | <0.001 | 1      |
| Angiotensin-converting enzyme inhibitor/Angiotensin receptor blocker                  | 37 (40.7)  | 52 (36.6)  | 179 (54.4) | 0.631  | 0.028  | <0.001 |
| Beta blockers                                                                         | 34 (37.4)  | 54 (38.0)  | 198 (60.2) | 1      | <0.001 | <0.001 |
| Mineralocorticoid receptor antagonist                                                 | 8 (8.8)    | 27 (19.0)  | 114 (34.7) | 0.052  | <0.001 | <0.001 |
| Diuretic                                                                              | 33 (36.3)  | 55 (38.7)  | 214 (65.1) | 0.810  | <0.001 | <0.001 |
| Direct oral anticoagulants /Warfarin used at admission                                | 19 (20.9)  | 39 (27.5)  | 150 (45.6) | 0.328  | <0.001 | <0.001 |
| Direct oral anticoagulants /Warfarin used at discharge                                | 22 (24.2)  | 71 (50.0)  | 179 (54.4) | <0.001 | <0.001 | 0.436  |
| Estimated glomerular filtration rate (eGFR) at admission (mL/min/1.73m <sup>2</sup> ) | 32.6±27.1  | 54.5±17.7  | 40.6±18.3  | <0.001 | 0.009  | <0.001 |
| eGFR at discharge (mL/min/1.73m <sup>2</sup> )                                        | 32.7±29.0  | 50.0±16.4  | 39.0±19.1  | <0.001 | <0.001 | <0.001 |

|                                                  |                   |                   |                   |                  |                  |                  |
|--------------------------------------------------|-------------------|-------------------|-------------------|------------------|------------------|------------------|
| <b>Creatinine clearance rate</b>                 |                   |                   |                   |                  |                  |                  |
| <b>(Ccr) at admission</b><br><b>(mL/min)</b>     | <b>19.8±13.1</b>  | <b>69.7±30.8</b>  | <b>33.3±15.5</b>  | <b>&lt;0.001</b> | <b>&lt;0.001</b> | <b>&lt;0.001</b> |
| <b>Ccr at discharge</b><br><b>(mL/min)</b>       | <b>20.2±13.3</b>  | <b>63.0±30.3</b>  | <b>31.9±14.5</b>  | <b>&lt;0.001</b> | <b>&lt;0.001</b> | <b>&lt;0.001</b> |
| <b>Creatinine at admission</b><br><b>(mg/dL)</b> | <b>2.7±2.5</b>    | <b>1.1±0.4</b>    | <b>1.3±0.6</b>    | <b>&lt;0.001</b> | <b>&lt;0.001</b> | <b>&lt;0.001</b> |
| <b>Creatinine at discharge</b><br><b>(mg/dL)</b> | <b>3.0±3.1</b>    | <b>1.2±0.5</b>    | <b>1.4±0.7</b>    | <b>&lt;0.001</b> | <b>&lt;0.001</b> | <b>&lt;0.001</b> |
| <b>Albumin (g/dL)</b>                            | <b>3.2±0.5</b>    | <b>3.6±0.4</b>    | <b>3.4±0.5</b>    | <b>&lt;0.001</b> | <b>0.001</b>     | <b>&lt;0.001</b> |
| <b>Total protein (g/dL)</b>                      | <b>7.0±0.7</b>    | <b>7.0±0.6</b>    | <b>7.0±0.6</b>    | <b>0.993</b>     | <b>0.711</b>     | <b>0.653</b>     |
| <b>C-reactive protein</b><br><b>(mg/dL)</b>      | <b>4.1±5.5</b>    | <b>1.4±2.5</b>    | <b>2.2±4.0</b>    | <b>&lt;0.001</b> | <b>&lt;0.001</b> | <b>0.412</b>     |
| <b>Hemoglobin (g/dL)</b>                         | <b>11.0±2.1</b>   | <b>13.6±2.5</b>   | <b>11.4±2.0</b>   | <b>&lt;0.001</b> | <b>0.164</b>     | <b>&lt;0.001</b> |
| <b>Systolic blood pressure</b>                   |                   |                   |                   |                  |                  |                  |
| <b>(SBP) at admission</b><br><b>(mmHg)</b>       | <b>137.5±27.1</b> | <b>131.4±25.9</b> | <b>130.8±25.4</b> | <b>0.091</b>     | <b>0.038</b>     | <b>0.831</b>     |
| <b>SBP at discharge (mmHg)</b>                   | <b>110.0±20.4</b> | <b>109.8±16.2</b> | <b>113.9±18.0</b> | <b>0.936</b>     | <b>0.103</b>     | <b>0.016</b>     |
| <b>Diastolic blood pressure</b>                  |                   |                   |                   |                  |                  |                  |
| <b>(DBP) at admission</b><br><b>(mmHg)</b>       | <b>79.7±69.0</b>  | <b>76.6±20.1</b>  | <b>69.3±16.3</b>  | <b>0.280</b>     | <b>0.08</b>      | <b>&lt;0.001</b> |
| <b>DBP at discharge (mmHg)</b>                   | <b>56.0±11.1</b>  | <b>62.0±9.3</b>   | <b>59.1±10.1</b>  | <b>&lt;0.001</b> | <b>0.017</b>     | <b>0.003</b>     |
| <b>Heart rate at admission</b><br><b>(bmp)</b>   | <b>86.9±21.0</b>  | <b>94.6±26.9</b>  | <b>80.8±20.6</b>  | <b>0.016</b>     | <b>0.014</b>     | <b>&lt;0.001</b> |
| <b>Heart rate at discharge</b><br><b>(bmp)</b>   | <b>69.7±16.8</b>  | <b>69.8±13.1</b>  | <b>70.5±13.3</b>  | <b>0.966</b>     | <b>0.687</b>     | <b>0.605</b>     |

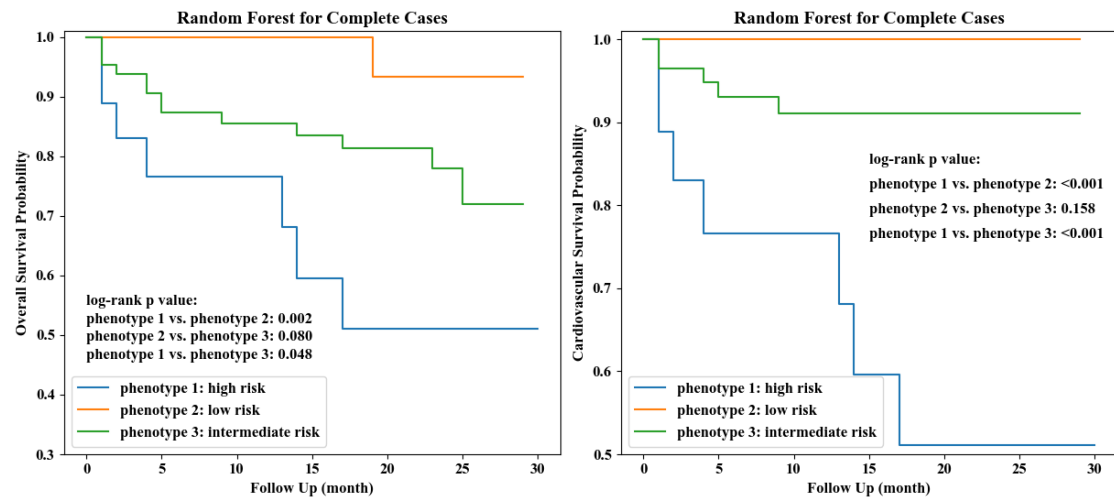

**Figure S2.** Survival curves of phenotypes classified by random forest for complete cases in validation dataset.
